# Supplementary material for: Synthesis and antiplasmodial activity in vitro of new ferrocene–chloroquine analogues
Source: Royal Society of Chemistry journal article supplement (doi:10.1039/b303335j), 2003-01-01
Supplement: b303335j.doc [file b303335j.doc]

Supplementary information:

**Synthesis and Antiplasmodial Activity in vitro of New Ferrocene-chloroquine Analogues**

**Paul Beagley, Margaret A.L. Blackie, Kelly Chibale, Cailean Clarkson, Reinout Meijboom, John R. Moss,* Peter J. Smith and Hong Su.**

**NMR scale synthesis of 1’- dimethylaminomethylferrocene-1-carboxaldehyde 7a.** A Teflon valved NMR tube was loaded with of 1’-dimethylaminomethyl-1-tri-*n*-butylstannylferrocene (71.1 mg, 0.13 mmol). nBuLi in hexanes (86 mm, 1.6 M, 0.13 mmol) was added, followed by THF (1.0 cm3). Immediately a yellow precipitate was observed to form. After shaking the NMR tube for several minutes the volatiles were removed *in vacuo* and the remaining solid was dissolved in C6D6. 1H NMR confirmed the quantitative formation of the 1’‑dimethylaminomethyl-1-lithiumferrocenide-THF adduct.

H(C6D6, 400 MHz): 4.55 (s, 2H, Cp), 4.17 (s, 2H, Cp), 4.10 (s, 2H, Cp), 3.85 (s, 2H, Cp), 3.55 (m, 4H, -THF), 2.69 (s, 2H, CH2N), 2.02 (s, 6H, 2 CH3), 1.42 (s, 4H, -THF), 1.52 (m, 8 H), 1.32 (m, 8H) and 0.88 (m, 16 H) (SnnBu4).

*N,N*‑dimethylformamide (30 mm3, 0.39 mmol) was condensed into the NMR tube and the mixture shaken. 1H NMR revealed quantitative conversion. Water (5 L, 0.28 mol) was added to the mixture and the yellow mixture turned red immediately. The resulting 1H NMR spectrum revealed quantitative conversion of the lithium reagent to 1’-dimethylaminomethylferrocene-1-carbaldehyde. H(C6D6, 400 MHz): 9.8 (s, 1H CHO), 4.43 (s, 2H, Cp), 4.09 (s, 2H, Cp), 3.99 (s, 2H, Cp), 3.83 (s, 2H, Cp) 3.0 (s, 2H, C*H2*N), 1.98 (s, 6H, NMe2). In the mixture the following peaks were also present: : 7.65, 2.38 (DMF);  2.15, 0.56 (br) (HNMe2);  1.55, 1.32, 0.88 (SnnBu4);  3.55, 1.41 (THF);  1.35 (H2O).

The volatiles were removed *in vacuo* to give an red oil. 1H NMR of this oil showed a mixture of **7a** and tetrabutyltin.
